# Supplementary material for: Formulation of Bioerodible Ketamine Microparticles as an Analgesic Adjuvant Treatment Produced by Supercritical Fluid Polymer Encapsulation
Source: MDPI journal article supplement (doi:10.3390/pharmaceutics10040264), 2018-12-06
Supplement: s1 [file s1]

## Supplementary Information:

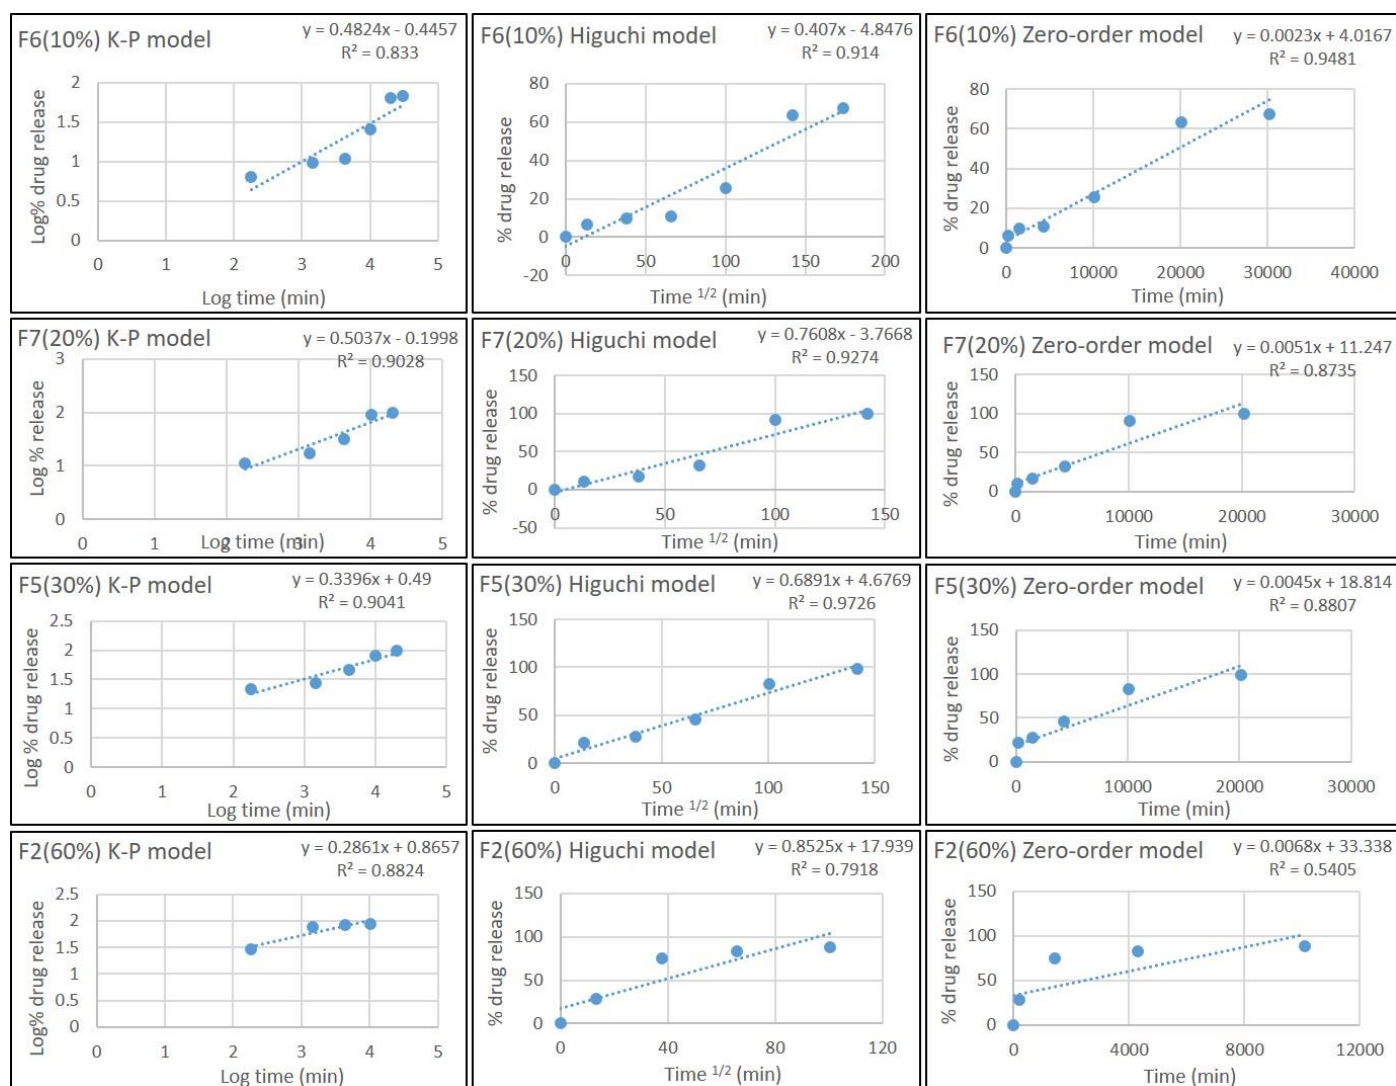

**Figure S1.** Drug release kinetics plots of F2, F5, F6 and F7.

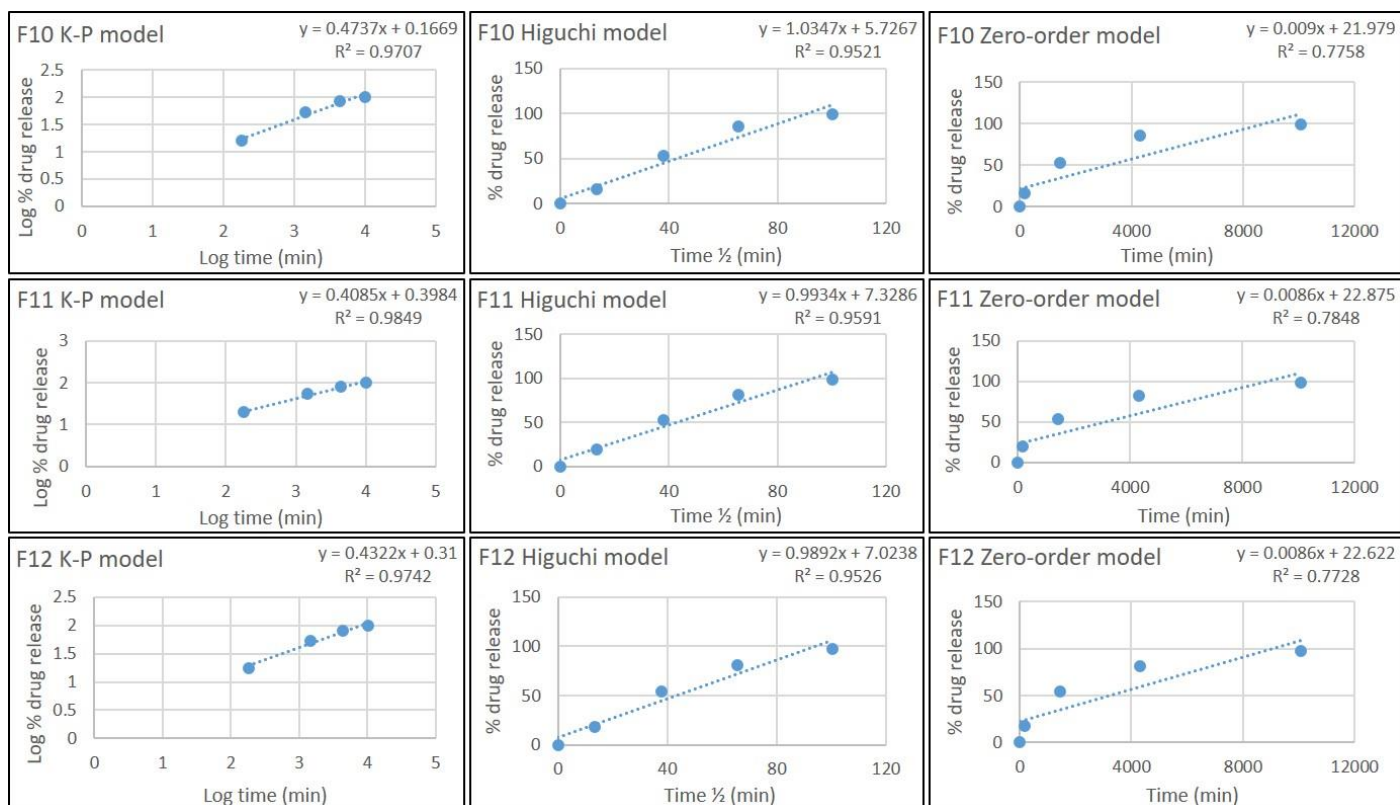

**Figure S2.** Drug release kinetics plots of F10, F11 and F12.

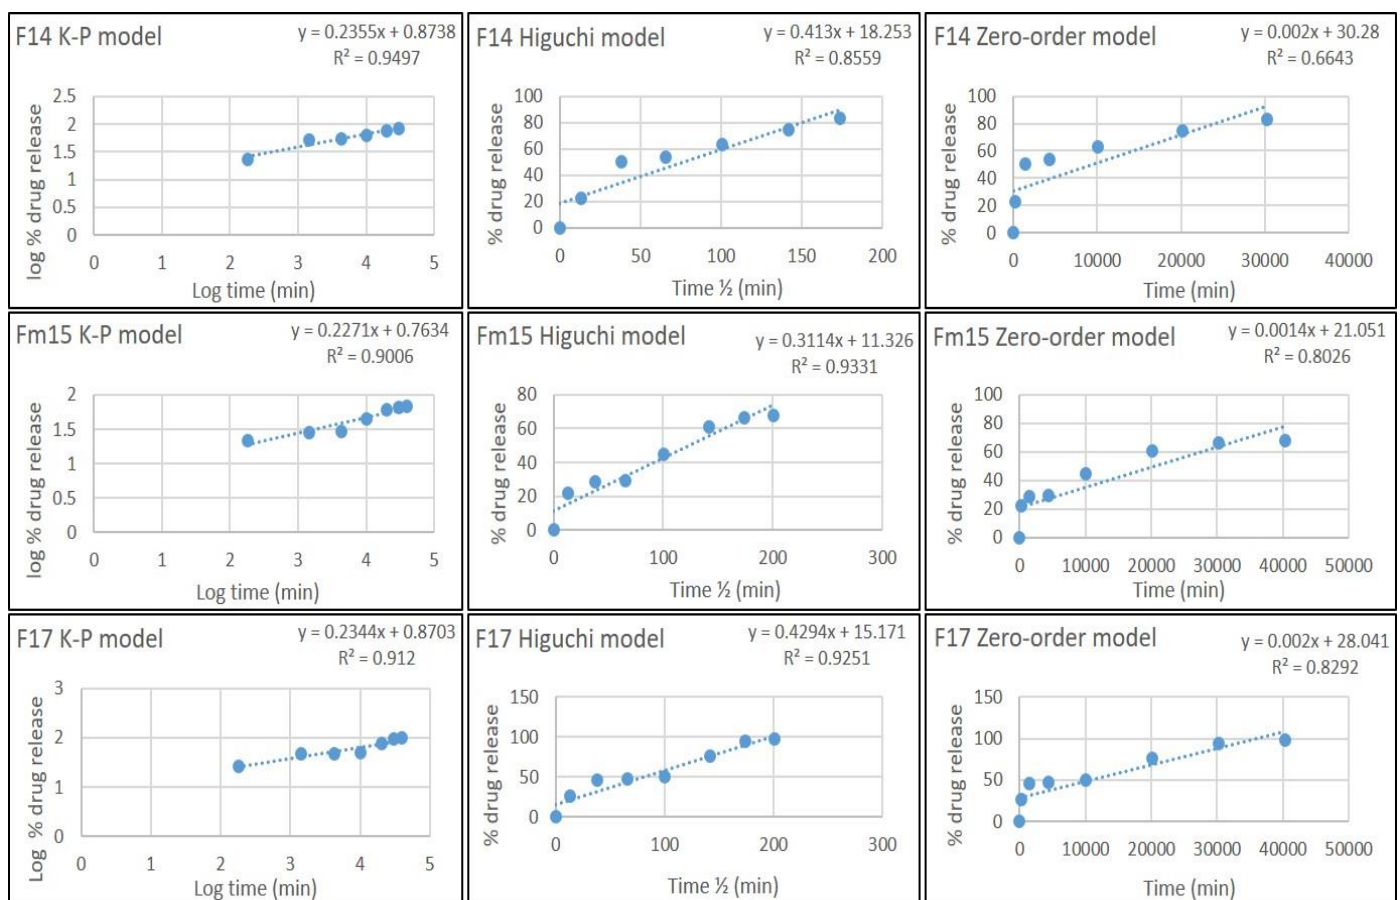

**Figure S3.** Drug release kinetics plots of F14, F15 and F17.

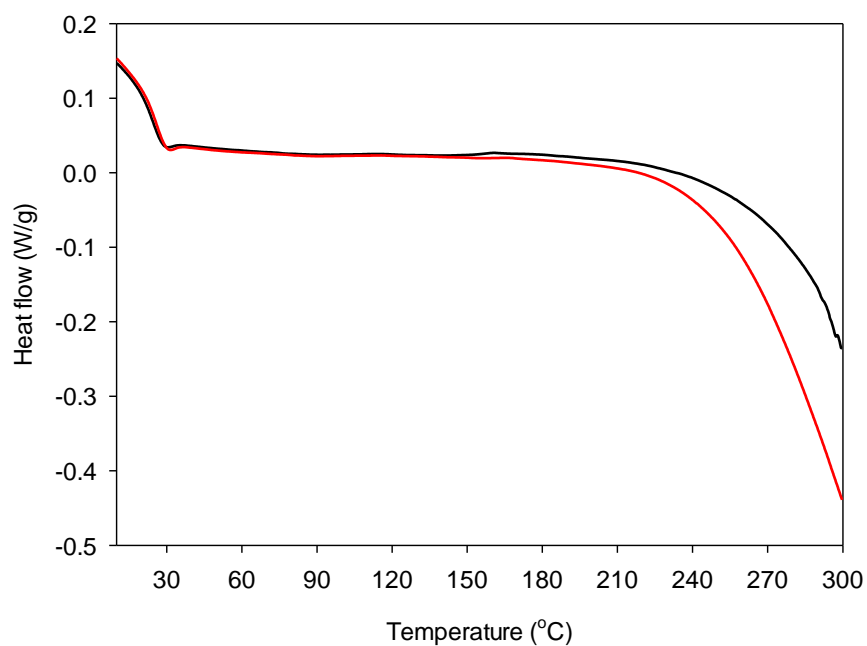

**Figure S4.** DSC curves of PLGA5050-1.5E before and after loading with ketamine. The curves displayed above are the 2<sup>nd</sup> heating. Heating rate is 10 °C/min from 0 to 300 °C.

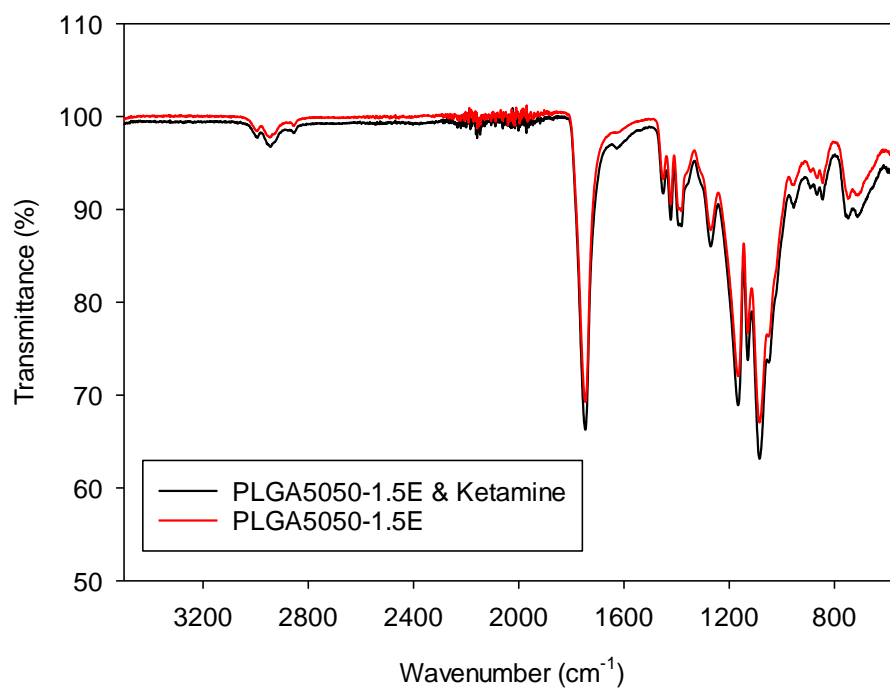

**Figure S5.** FTIR spectra of PLGA5050-1.5E before and after loading with ketamine.
